# Supplementary material
Source: Springer Nature journal article supplement (https://www.springermedizin.de/resource/supplementary/12889_2008_1333_MOESM3_ESM.pdf/9502974)

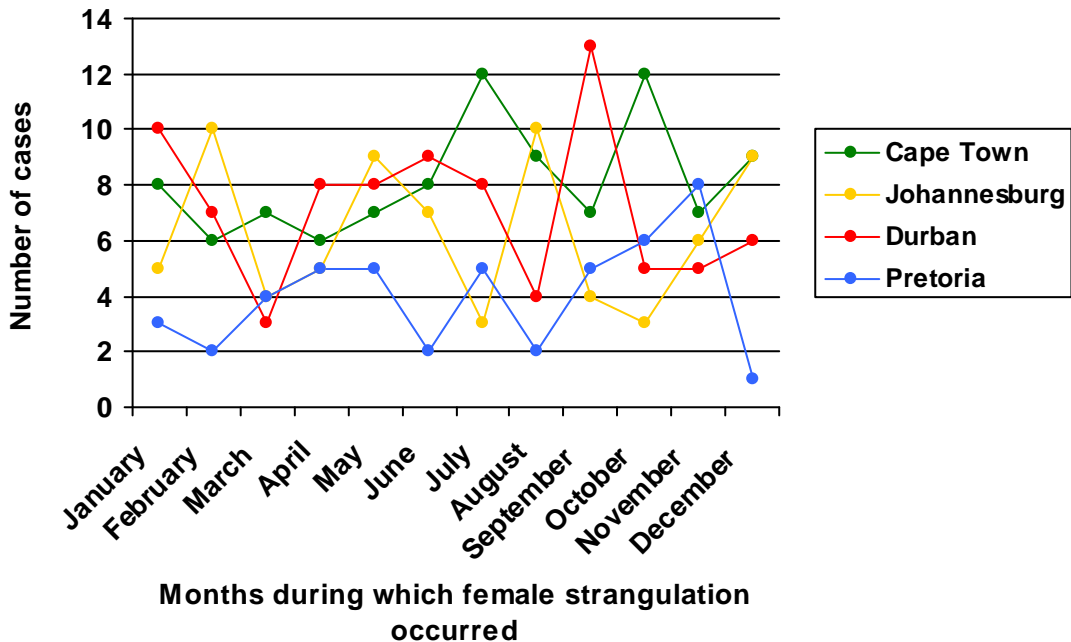

Supplement: MOESM3 [file 9502974]
